# Supplementary material for: Effects of chloride transport on the bioelectrochemical remediation of nitrate-contaminated groundwater
Source: Royal Society of Chemistry journal article supplement (doi:10.1039/d4ew00335g), 2024-01-01
Supplement: d4ew00335g1.pdf [file d4ew00335g1.pdf]

Supplementary Information

Effects of Chloride Transport on the  
Bioelectrochemical Remediation of Nitrate  
Contaminated Groundwater

Hanyu Tang, McKenzie Burns, Mohan Qin\*

Department of Civil and Environmental Engineering, University of Wisconsin–Madison, Madison,

Wisconsin 53706, USA

\* Corresponding author. E-mail: [mohan.qin@wisc.edu](mailto:mohan.qin@wisc.edu)

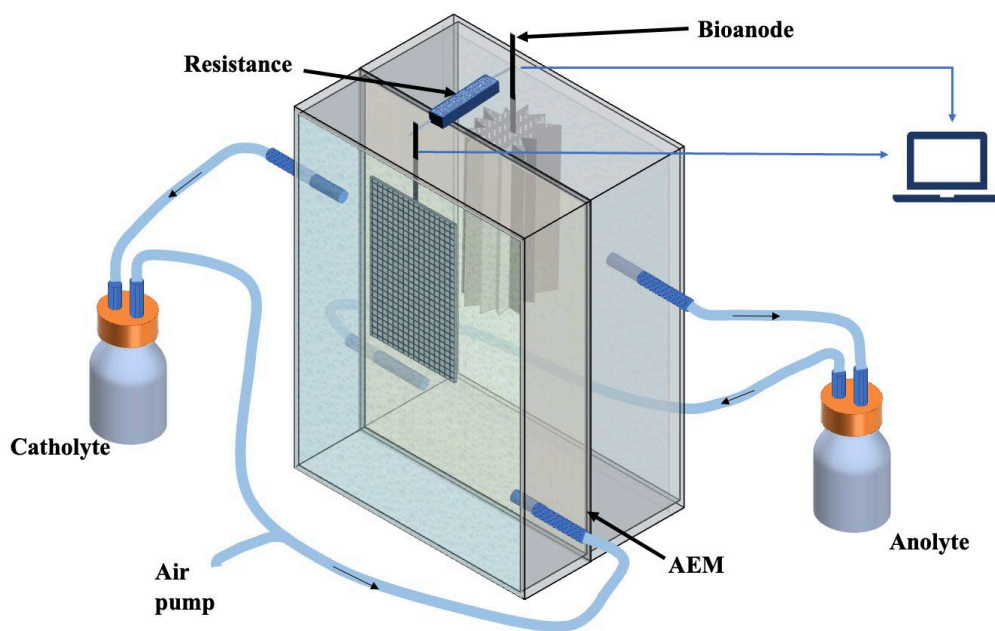

**Figure S1.** The schematic of membrane-based bioelectrochemical system (MBES).

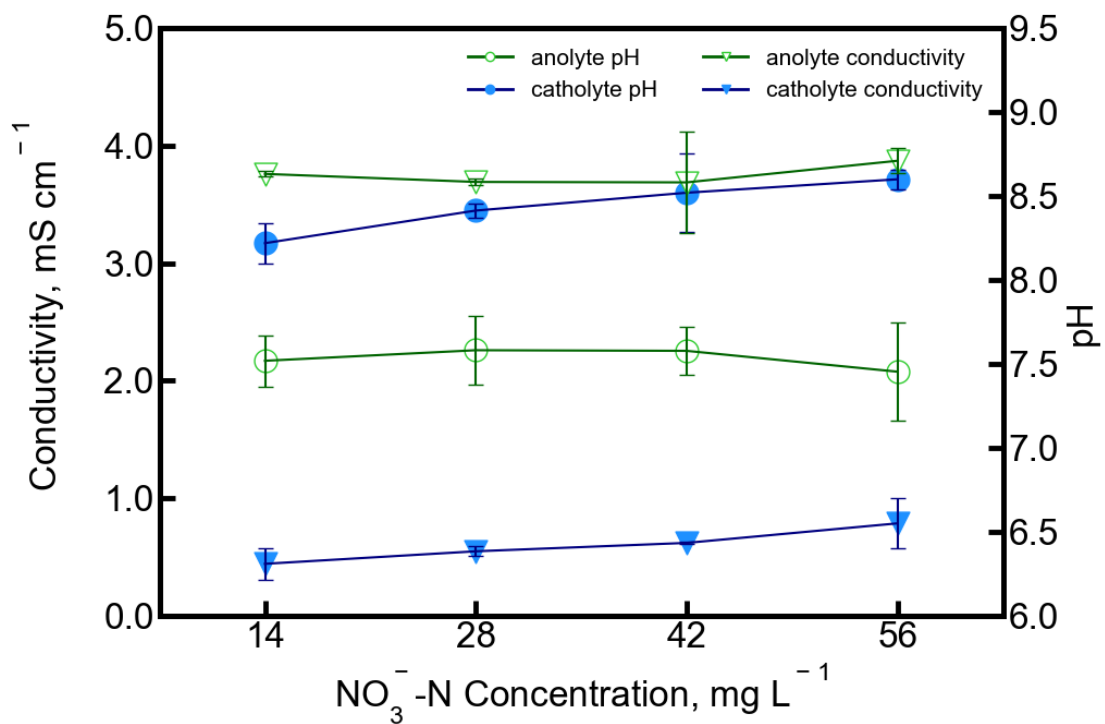

**Figure S2.** pH and conductivity of catholyte and anolyte of MBES under  $\text{NO}_3^-$ -N concentration of 14, 28, 42, and 56  $\text{mg L}^{-1}$ .

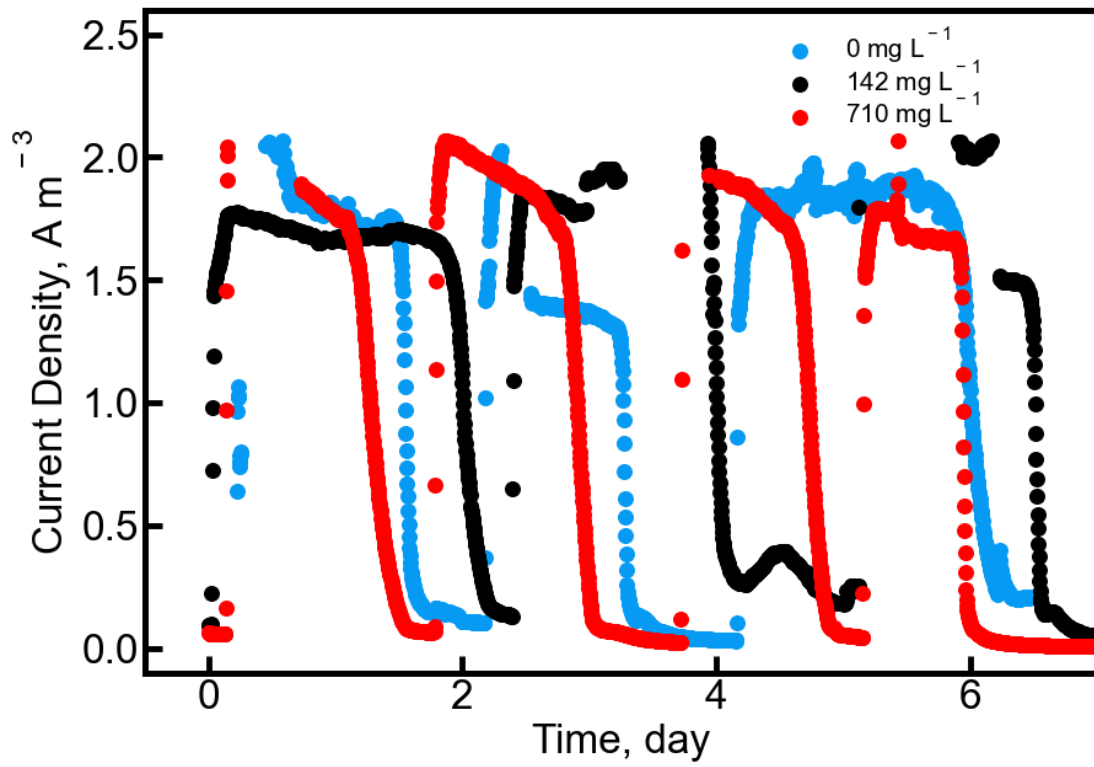

**Figure S3.** The current density profiles as a function of time under influent chloride concentrations of 0, 142, and 710 mg L<sup>-1</sup>.

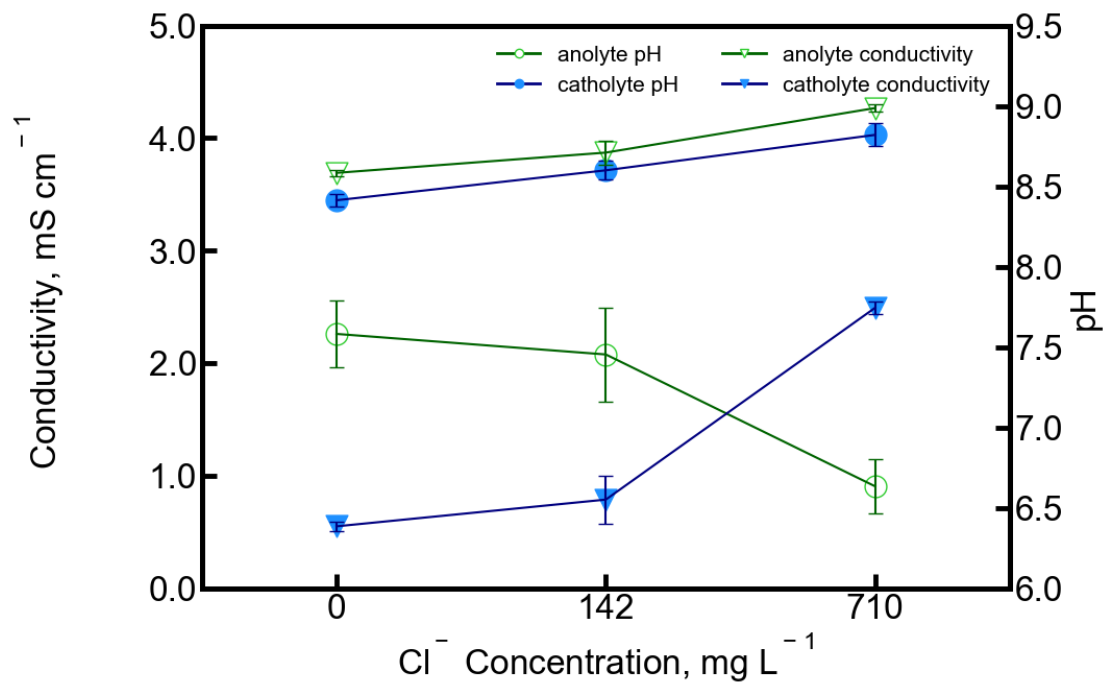

**Figure S4.** pH and conductivity of catholyte and anolyte of MBES fed with synthetic nitrate-rich waters with chloride concentration of 0, 142, and 710 mg L<sup>-1</sup>.

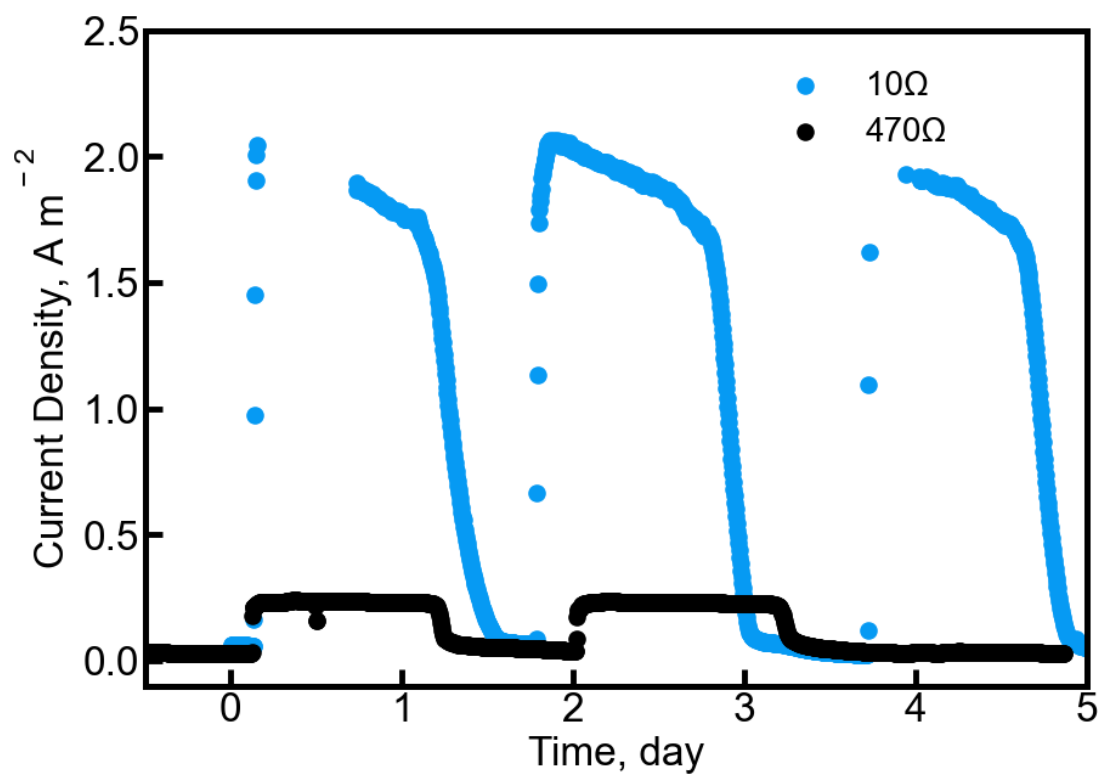

**Figure S5.** The current density profiles under external resistances of 10 Ω and 470 Ω without the presence of chloride ions in catholyte influent.

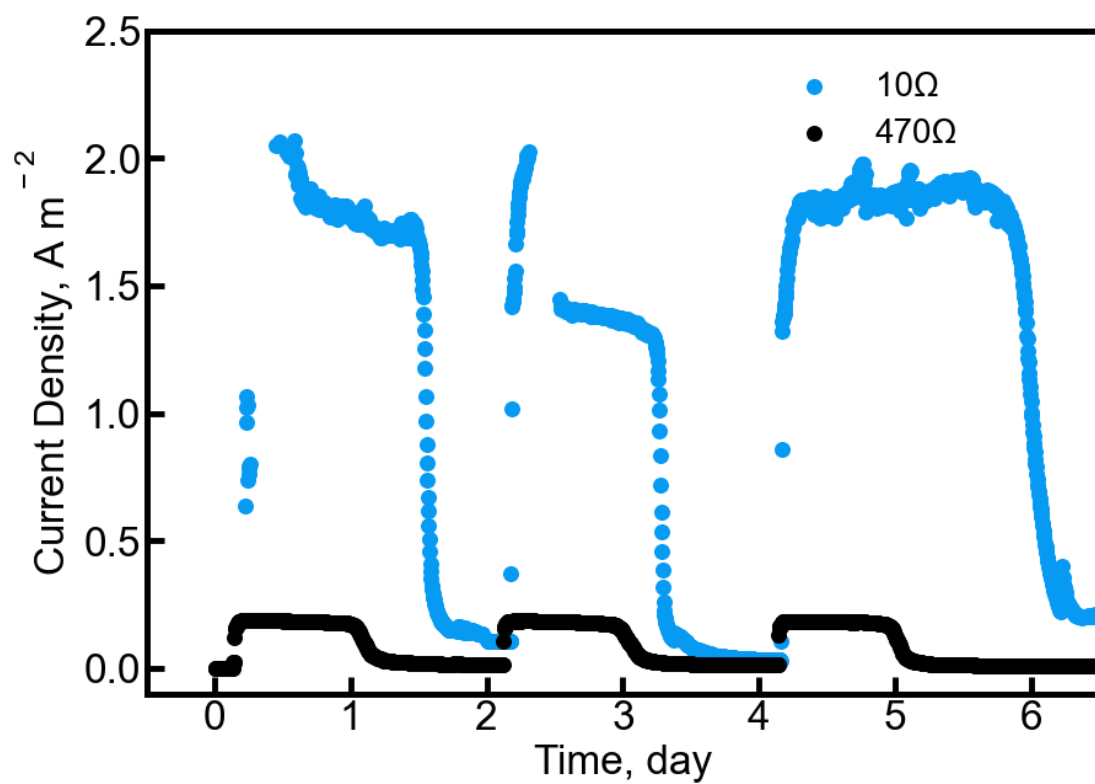

**Figure S6.** The current density profiles under external resistances of 10  $\Omega$  and 470  $\Omega$  with the presence of chloride ions ( $710 \text{ mg L}^{-1}$ ) in the catholyte influent.

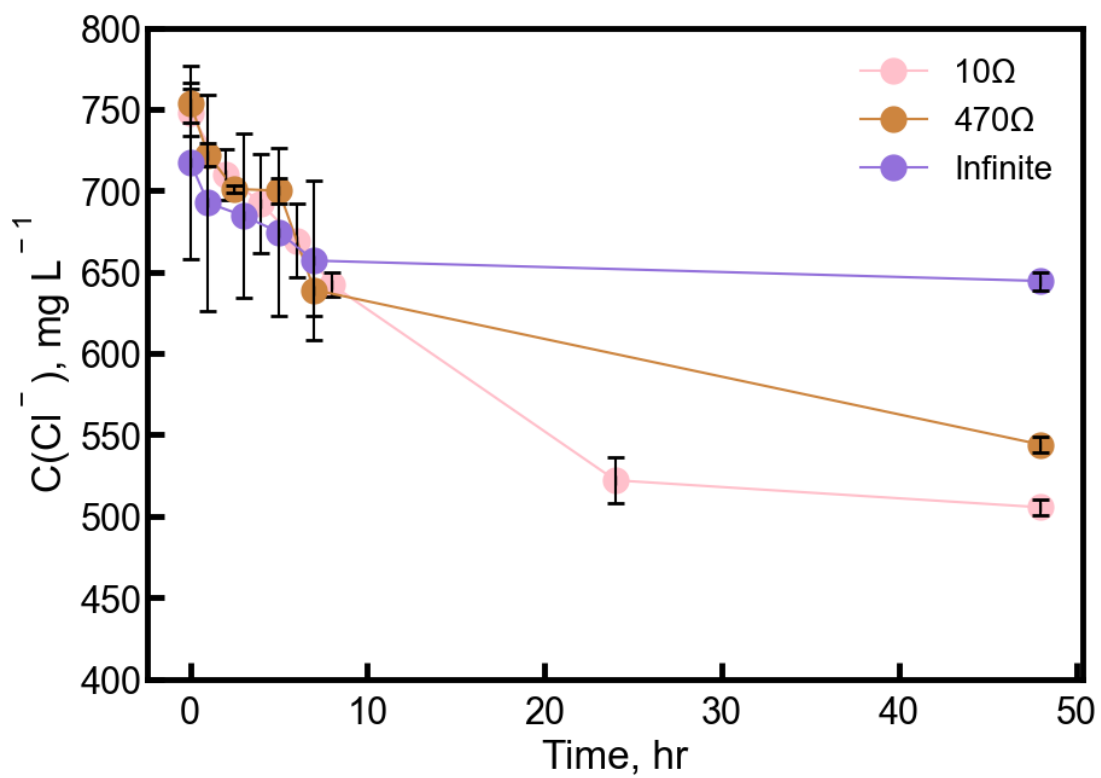

**Figure S7.** The catholyte chloride concentration as a function of time under external resistance of 10, 470  $\Omega$  and infinite (open circuit condition).



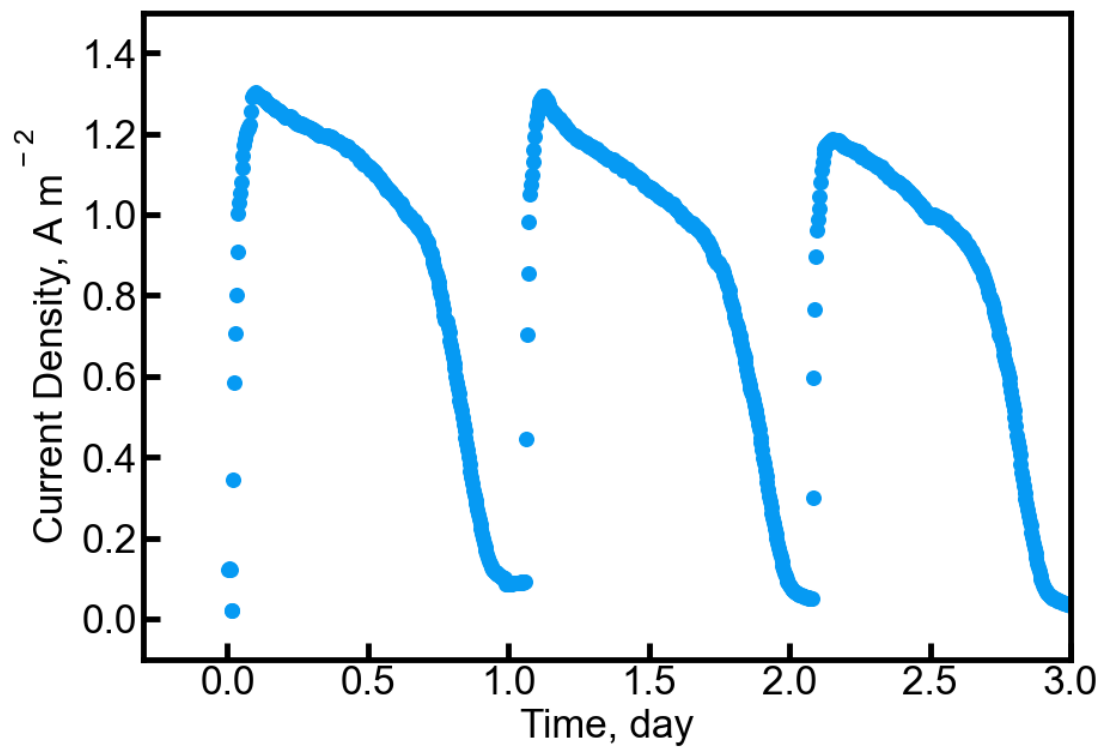

**Figure S8** The current density profile when the catholyte influent was real groundwater.

**Table S1.** Influent compositions for each condition. The recipe of stock, trace and phosphate buffer (PBS) solutions can be found in Burns & Qin, 2023

| Experimental Conditions                              | Anolyte                                                                                                                                                                         | Catholyte <sup>a</sup>                                | External resistance |
|------------------------------------------------------|---------------------------------------------------------------------------------------------------------------------------------------------------------------------------------|-------------------------------------------------------|---------------------|
| Impact of nitrate concentration                      |                                                                                                                                                                                 | 14 mg L <sup>-1</sup> NO <sub>3</sub> <sup>-</sup> -N | 10Ω                 |
|                                                      |                                                                                                                                                                                 | 28 mg L <sup>-1</sup> NO <sub>3</sub> <sup>-</sup> -N | 10Ω                 |
|                                                      |                                                                                                                                                                                 | 42 mg L <sup>-1</sup> NO <sub>3</sub> <sup>-</sup> -N | 10Ω                 |
|                                                      |                                                                                                                                                                                 | 56 mg L <sup>-1</sup> NO <sub>3</sub> <sup>-</sup> -N | 10Ω                 |
| Impact of chloride concentration                     |                                                                                                                                                                                 | 28 mg L <sup>-1</sup> NO <sub>3</sub> <sup>-</sup> -N | 10Ω                 |
|                                                      |                                                                                                                                                                                 | 28 mg L <sup>-1</sup> NO <sub>3</sub> <sup>-</sup> -N | 10Ω                 |
| Impact of current density (with Cl <sup>-</sup> )    | 1g L <sup>-1</sup> NaAc,<br>10 mL L <sup>-1</sup> stock solution,<br>10 mL L <sup>-1</sup> Phosphate-Buffered Saline (PBS),<br>1 mL L <sup>-1</sup> trace solution <sup>b</sup> | 142 mg L <sup>-1</sup> Cl <sup>-</sup>                |                     |
|                                                      |                                                                                                                                                                                 | 28 mg L <sup>-1</sup> NO <sub>3</sub> <sup>-</sup> -N | 10Ω                 |
|                                                      |                                                                                                                                                                                 | 710 mg L <sup>-1</sup> Cl <sup>-</sup>                |                     |
|                                                      |                                                                                                                                                                                 | 28 mg L <sup>-1</sup> NO <sub>3</sub> <sup>-</sup> -N | 10Ω                 |
|                                                      |                                                                                                                                                                                 | 710 mg L <sup>-1</sup> Cl <sup>-</sup>                |                     |
|                                                      |                                                                                                                                                                                 | 28 mg L <sup>-1</sup> NO <sub>3</sub> <sup>-</sup> -N | 470Ω                |
|                                                      |                                                                                                                                                                                 | 710 mg L <sup>-1</sup> Cl <sup>-</sup>                |                     |
|                                                      |                                                                                                                                                                                 | 28 mg L <sup>-1</sup> NO <sub>3</sub> <sup>-</sup> -N | Infinite            |
| Impact of current density (without Cl <sup>-</sup> ) |                                                                                                                                                                                 | 28 mg L <sup>-1</sup> NO <sub>3</sub> <sup>-</sup> -N | 10Ω                 |
|                                                      |                                                                                                                                                                                 | 28 mg L <sup>-1</sup> NO <sub>3</sub> <sup>-</sup> -N | 470Ω                |
|                                                      |                                                                                                                                                                                 | 28 mg L <sup>-1</sup> NO <sub>3</sub> <sup>-</sup> -N | Infinite            |
| Real groundwater                                     |                                                                                                                                                                                 | Groundwater                                           | 10Ω                 |

<sup>a</sup> All of the catholyte solutions are added 0.02M of PBS.

<sup>b</sup> All of the anolyte solutions are the same which are 1 g L<sup>-1</sup> NaAc, 10 mL L<sup>-1</sup> stock solution, 10 mL L<sup>-1</sup> Phosphate-Buffered Saline (PBS), 1 mL L<sup>-1</sup> trace solution

**Table S2.** Nitrate removal rate, COD removal efficiency, coulombic efficiency and produced charge of the system when catholyte influent  $\text{NO}_3^-$ -N concentrations were 14, 28, 42, and 56  $\text{mg L}^{-1}$ .

| $c(\text{NO}_3^-)\text{-N}/\text{mg L}^{-1}$ | $\text{NO}_3^-$ -N removal rate/ $\text{mg L}^{-1} \text{hr}^{-1}$ | Coulombic efficiency/% | Produced charge/C |
|----------------------------------------------|--------------------------------------------------------------------|------------------------|-------------------|
| 14                                           | $2.96 \pm 0.24$                                                    | $15.8 \pm 6.4$         | $572 \pm 246$     |
| 28                                           | $4.77 \pm 0.14$                                                    | $22.8 \pm 7.8$         | $815 \pm 282$     |
| 42                                           | $5.40 \pm 0.33$                                                    | $5.5 \pm 1.4$          | $205 \pm 22$      |
| 56                                           | $8.28 \pm 0.01$                                                    | $6.6 \pm 5.3$          | $230 \pm 24$      |

**Table S3.** Nitrate removal efficiency, nitrate removal rate, COD removal efficiency, and coulombic efficiency of the system when catholyte influent chloride concentrations were 0, 142, and 710 mg L<sup>-1</sup>.

| c(Cl <sup>-</sup> )/mg L <sup>-1</sup> | NO <sub>3</sub> <sup>-</sup> -N removal efficiency /% | COD removal efficiency/% | Coulombic efficiency/% |
|----------------------------------------|-------------------------------------------------------|--------------------------|------------------------|
| 0                                      | 100                                                   | 89.0 ± 3.1               | 22.8 ± 7.8             |
| 142                                    | 100                                                   | 92.4 ± 6.6               | 26.2 ± 9.2             |
| 710                                    | 97.84 ± 2.2                                           | 89.5 ± 2.4               | 19.5 ± 4.1             |

**Table S4.** Nitrate removal efficiency, COD removal rate, and coulombic efficiency of the system when external resistance is different

| External resistance                                    | NO <sub>3</sub> <sup>-</sup> -N removal efficiency/% | COD removal/% | Coulombic efficiency/% |
|--------------------------------------------------------|------------------------------------------------------|---------------|------------------------|
| 10Ω (710 Cl <sup>-</sup> mg L <sup>-1</sup> )          | 97.8 ± 2.2                                           | 89.5 ± 2.4    | 19.5 ± 4.1             |
| 470Ω (710 Cl <sup>-</sup> mg L <sup>-1</sup> )         | 100                                                  | 96.3 ± 4.9    | 3.25 ± 2.2             |
| Open circuit (710 Cl <sup>-</sup> mg L <sup>-1</sup> ) | 92.4 ± 1.1                                           | 94.7 ± 2.1    | /                      |
| 10Ω (without Cl <sup>-</sup> )                         | 100                                                  | 89.0 ± 3.1    | 22.8 ± 7.8             |
| 470Ω (without Cl <sup>-</sup> )                        | 96.1 ± 4.6                                           | 98.3 ± 0.1    | 1.67 ± 0.01            |
| Open circuit (without Cl <sup>-</sup> )                | 95.4 ± 0.1                                           | 95.6 ± 0.1    | /                      |

**Table S5.** The detailed concentration of major ions in the groundwater sample

| Element                         | Concentration mg L <sup>-1</sup> |
|---------------------------------|----------------------------------|
| Ca <sup>2+</sup>                | 96.1                             |
| K <sup>+</sup>                  | 27.8                             |
| Mg <sup>2+</sup>                | 33.3                             |
| Na <sup>+</sup>                 | 7.9                              |
| Cl <sup>-</sup>                 | 44.2                             |
| NO <sub>3</sub> <sup>-</sup> -N | 44.5                             |
